# Supplementary material for: Natural and induced loss of function mutations in SlMBP21 MADS-box gene led to jointless-2 phenotype in tomato
Source: Springer Nature journal article supplement (doi:10.1038/s41598-017-04556-1), 2017-06-26
Supplement: MOESM1 [file 41598_2017_4556_MOESM1_ESM.pdf]

## SUPPLEMENTARY DATA

### RESEARCH ARTICLE

**Natural and induced loss of function mutations in *SIMBP21* MADS-box gene led to *jointless-2* phenotype in tomato**

**Maria Victoria Gomez Roldan<sup>a+</sup>, Claire Périlleux<sup>b+</sup>, Halima Morin<sup>a</sup>, Samuel Huerga-Fernandez<sup>b</sup>, David Latrasse<sup>a</sup>, Moussa Benhamed<sup>a</sup>, Abdelhafid Bendahmane<sup>a,\*</sup>**

<sup>a</sup> *Institute of Plant Sciences Paris-Saclay (IPS2), CNRS, INRA, University Paris-Sud, University of Evry, University Paris-Diderot, Sorbonne Paris-Cite, University of Paris-Saclay, 91405, Orsay, France.*

<sup>b</sup> *InBioS, PhytoSYSTEMS, Laboratory of Plant Physiology, University of Liège, Sart Tilman Campus Quartier Vallée 1, Chemin de la Vallée 4, B-4000, Liège, Belgium.*

<sup>+</sup> These authors equally contribute to this work.

<sup>\*</sup> Address correspondence to [abdelhafid.bendahmane@inra.fr](mailto:abdelhafid.bendahmane@inra.fr)

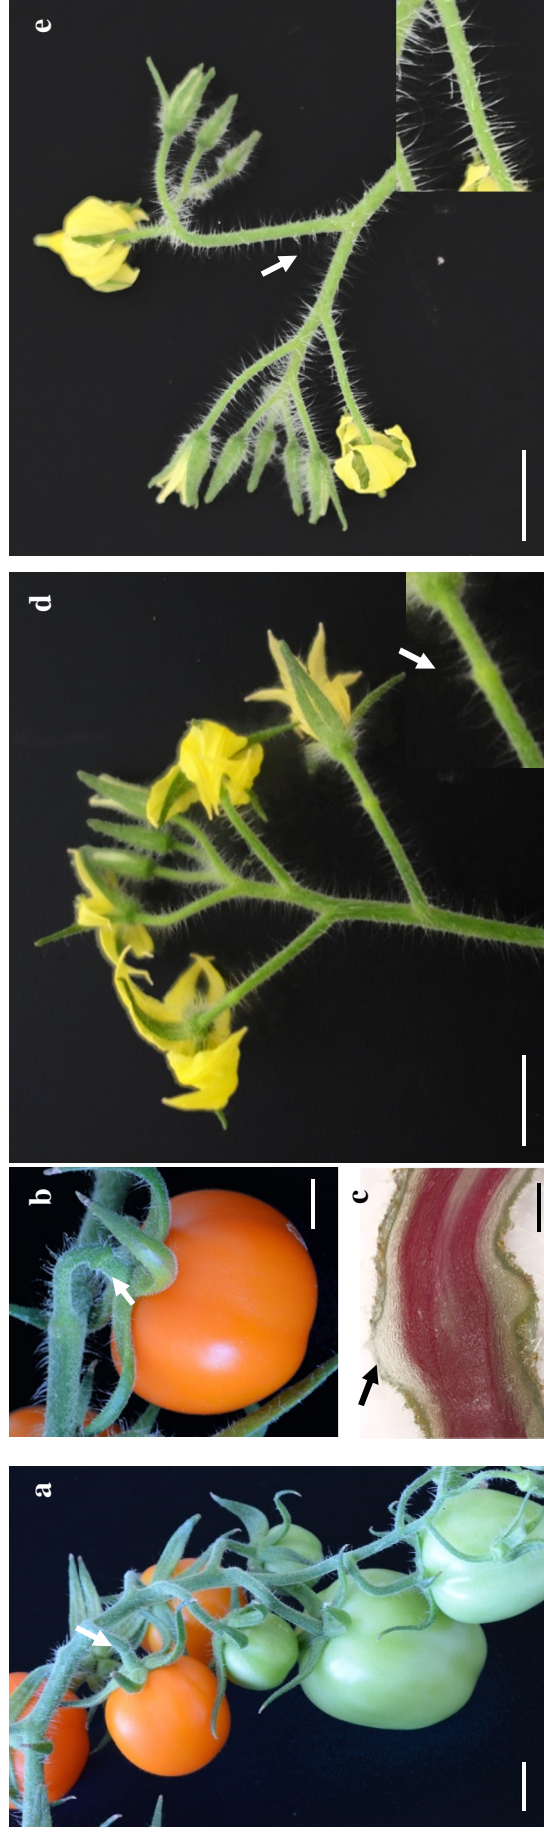

**Supplementary Fig. 1.** Particular phenotypes of *j-2* (LA3899) mutant. (a) Inflorescence with ripe round and unripe elongated fruits. Scale = 1 cm. (b) AZ like structure on pedicels of plants growing in low light conditions. Scale = 7 mm. (c) Longitudinal section of a pedicel stained with phloroglucinol. Black arrow shows the absence of a knuckle-like structure. (d) Inflorescence of plants growing in low light conditions. The *inset* shows the formation of a knuckle-like structure on the first pedicel (white arrow). Scale = 1 mm. (e) Branched inflorescence (white arrow) of plants growing in high light conditions. The *inset* shows the absence of a knuckle-like structure. Scale = 1 cm

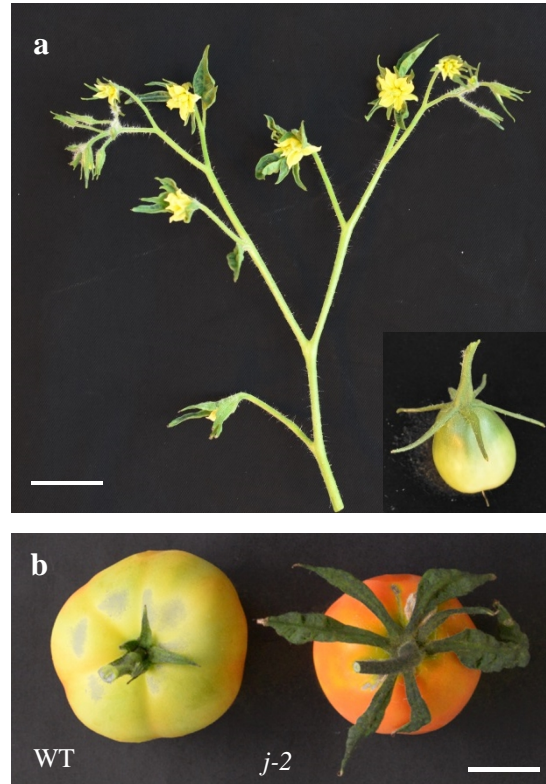

**Supplementary Fig. 2.** Particular phenotypes of *j-2* (LA0315) mutant. (a) Branched inflorescence structure with leafy sepals and elongated fruits. Scale = 3cm. (b) *j-2* mutant fruit showing leafy sepals compared to a WT fruit. Scale = 2cm.

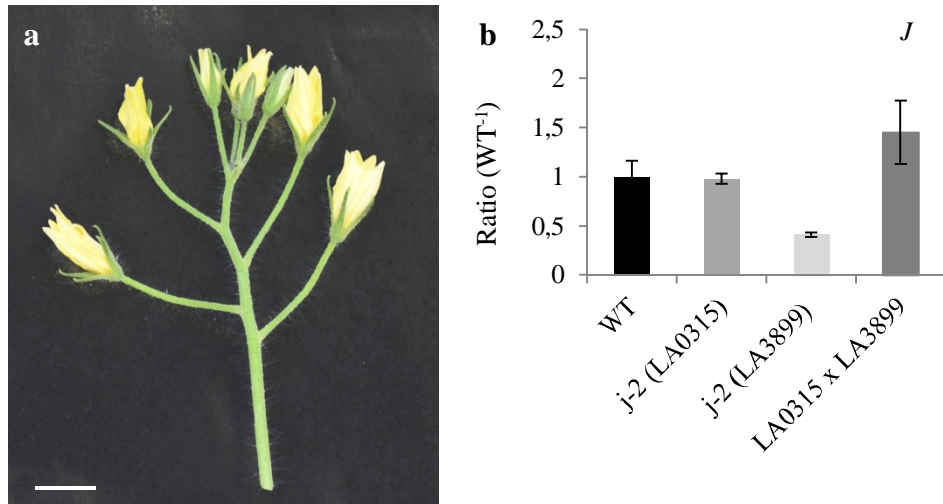

**Supplementary Fig. 3.** Inflorescence phenotype of *j-2* x *j-2* (LA0315 x LA3899) double mutant. (a) Inflorescence structure of F1 plants with jointless pedicels. Scale = 1cm. (b) Expression analysis of *J* in single and double mutants, relative to WT. Bar= SDVE.

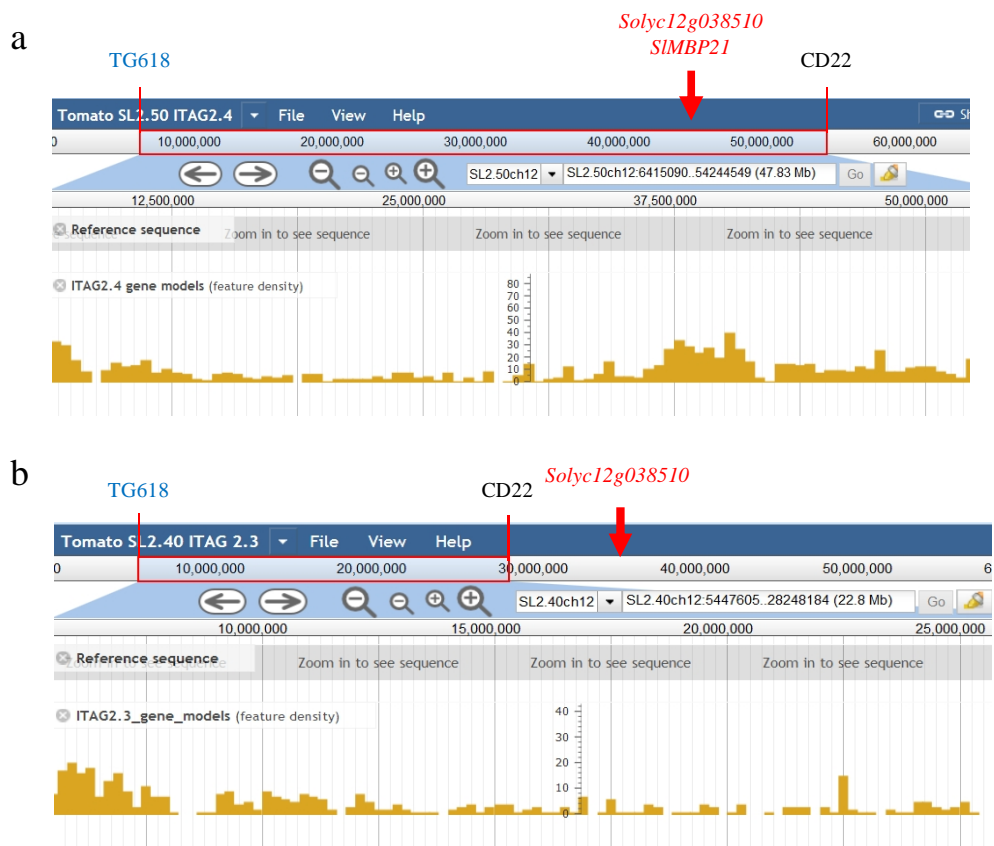

**Supplementary Fig. 4.** Position of TG618 and CD22 markers on chromosome 12 of the Tomato Genome. Markers TG618 (blue) and CD22 (black) in version *SL2.50* ITAG 2.4 (a) and *SL2.40* ITAG 2.3 (b). The *Solyc12g038510* gene (red) is included in the interval between the two markers according to the new version of the tomato genome from <https://solgenomics.net> database.

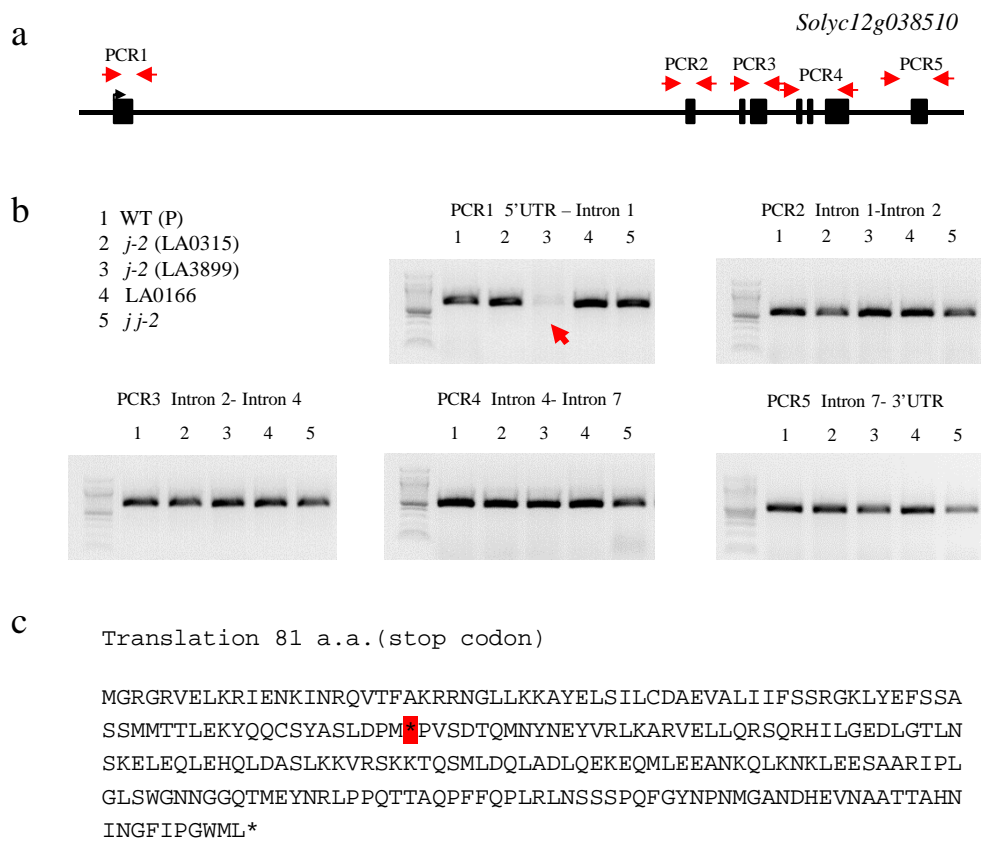

**Supplementary Fig. 5.** Genotyping of *j-2* mutants and *jj-2* double mutant. (a) Position of the primers on the *Solyc12g038510* locus used for genotyping. (b) PCRs on genomic DNA allowing to predict the insertion of a transposon in the *j-2* mutant (LA3899). (c) Single base substitution (T >A) in the second exon causing a premature stop codon (red asterisk) in the protein sequence of *j-2* mutant (LA0315), of *S. cheesmaniae* (LA0166) and *jj-2* double mutant.

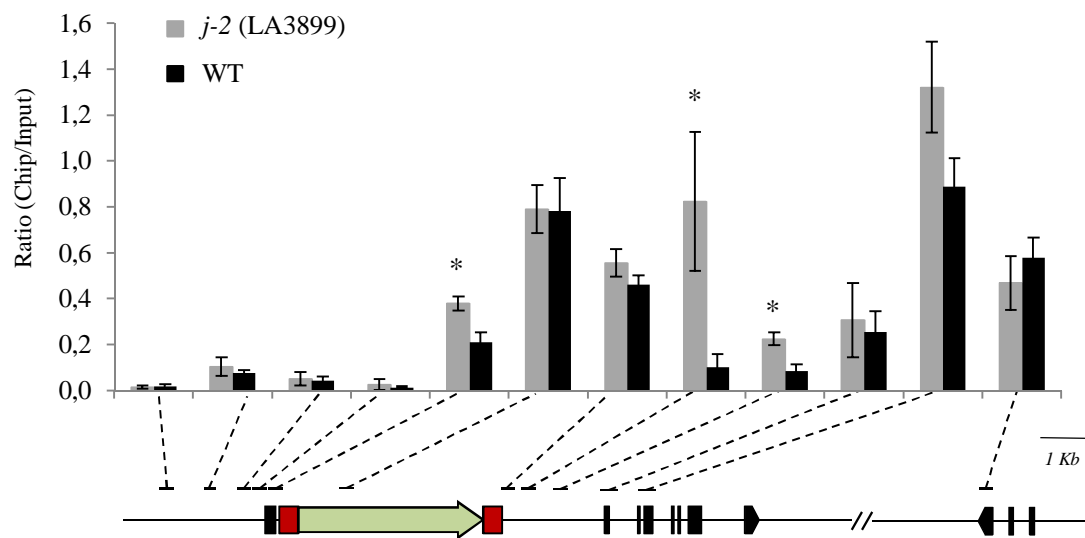

**Supplementary Fig. 6.** Ratio of DNA methylation levels in the *j-2* (LA3899) mutant compared with WT plants. PCR-MeDIP using anti-5meC antibody. Regions close to the *Rider* insertion were strongly methylated in *j-2* mutants. Error Bar = SDEV. \* = significant enrichment (P value < 0.01).

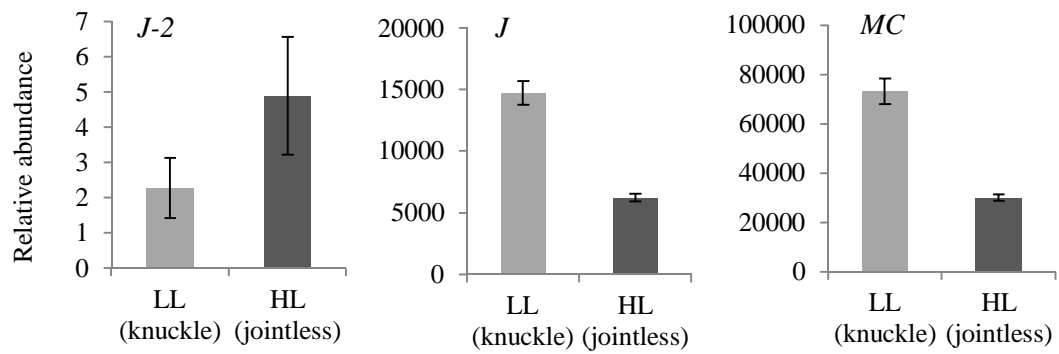

**Supplementary Fig. 7.** Expression of AZ genes (*J-2*, *J* and *MC*) in LA3899 flower pedicels showing or not knuckle-like structure (relative to the housekeeping gene, see Supplementary Table 2). Plants were grown under low (LL) or high (HL) light conditions. Bar = SDEV.



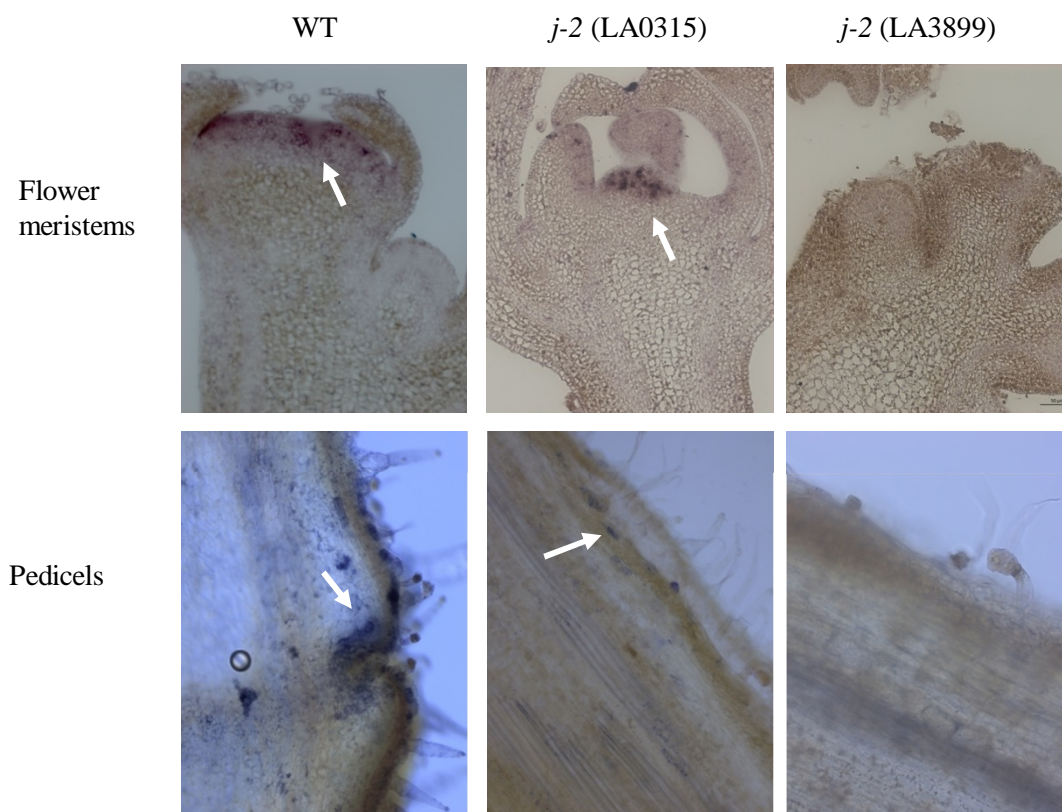

**Supplementary Fig. 8.** *in situ* hybridization on WT, *j-2* (LA0315) and *j-2* (LA3899) flower meristems and pedicels using *J-2* probe (CDS = 753 bp).

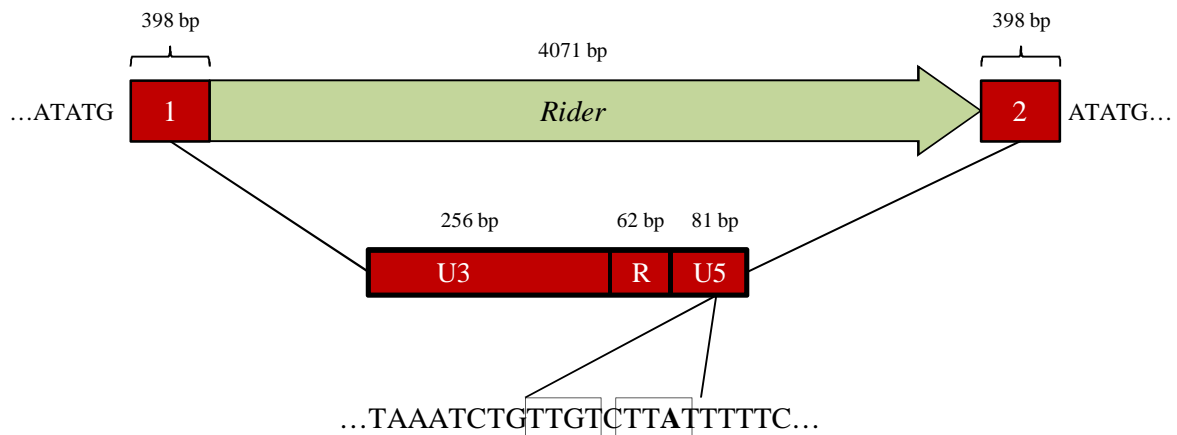

### Subtext 1. *Rider* retrotransposon causing gene silencing in LA3899 accession

The *Rider* retrotransposon is a high copy *Copia* transposable element (TE) from Class I which contains in its sequence a transposase and other proteins allowing autonomous transposition. *Rider* has been shown to be ubiquitous in the tomato genome and highly correlated with the disruption of genes when it is inserted into or very close to them.

The *Rider* element inserted in *J-2* locus is 4,867 bp in length with two identical long terminal repeat (LTR, 1 and 2 in red) on each side. The LTRs are 398-bp long and flanked by the target site duplication (TSD) with a nucleotide sequence of 5 bp (ATATG). The LTR sequence contains the three classical domains called U3 (the promoter), R (the polyadenylation signal), and U5 (the termination of synthesis of element RNA). The *Rider* in *J-2* locus (LA3899) contains a mutation in the U5 domain, one copy of the two TTGT boxes was mutated to TTAT in both LTR as observed in the *sun* locus. This seems to indicate a putatively read-through transcription of *Rider* on *j-2* locus (LA3899).

The rest of the *Rider* sequence (in green) encodes capsid-like proteins (CP), protease (PR), integrase (INT), reverse transcriptase (RT), and RNase-H (RH).

**Supplementary Table 1.** List of genes on chromosome 12 found in the TG618-CD22 genetic interval and differentially expressed in the flower pedicel abscission zone (FAZ) compared to the leaf abscission zone (LAZ). Average read depth (Avg RD) expression data were obtained from Sundaresan *et al.*<sup>26</sup>

| Gene name      | Gene Description                                                        | Avg RD FAZ | Avg RD LAZ | Log2(Ratio) |
|----------------|-------------------------------------------------------------------------|------------|------------|-------------|
| Solyc12g042500 | Gibberellin-regulated family protein                                    | 4484,99    | 960,85     | -2,23       |
| Solyc12g044330 | Aquaporin                                                               | 2034,81    | 177,26     | -3,54       |
| Solyc12g049400 | Protein TIFY 3B                                                         | 1890,25    | 58,60      | -5,04       |
| Solyc12g019320 | Multidrug resistance protein mdtK                                       | 847,36     | 121,39     | -2,81       |
| Solyc12g019740 | Thioredoxin family protein                                              | 573,13     | 230,31     | -1,32       |
| Solyc12g038510 | MADS box transcription factor 11                                        | 461,88     | 2,01       | -8,41       |
| Solyc12g044420 | Avr9/Cf-9 rapidly elicited protein 146                                  | 377,11     | 65,83      | -2,53       |
| Solyc12g039030 | Photosystem Q                                                           | 285,49     | 49,92      | -2,53       |
| Solyc12g042770 | Chloroplast post-illumination chlorophyll fluorescence increase protein | 259,19     | 86,69      | -1,58       |
| Solyc12g042580 | Blue copper-like protein                                                | 220,03     | 68,39      | -1,70       |
| Solyc12g040800 | C2 domain-containing protein                                            | 209,78     | 5,39       | -5,32       |
| Solyc12g017530 | Unknown Protein                                                         | 192,84     | 16,00      | -3,60       |
| Solyc12g019550 | Unknown Protein                                                         | 148,39     | 16,27      | -3,22       |
| Solyc12g044630 | Profilin                                                                | 131,55     | 34,83      | -1,92       |
| Solyc12g038520 | Squamosa promoter binding protein 3                                     | 116,54     | 18,07      | -2,73       |
| Solyc12g039070 | Strictosidine synthase family protein                                   | 112,47     | 6,16       | -4,19       |
| Solyc12g044280 | Photosystem I reaction center subunit VI, chloroplastic                 | 111,40     | 21,36      | -2,40       |
| Solyc12g042730 | Unknown Protein                                                         | 92,06      | 6,65       | -3,83       |
| Solyc12g044610 | Myb transcription factor                                                | 88,90      | 42,14      | -1,08       |
| Solyc12g021280 | Protein kinase                                                          | 78,72      | 33,94      | -1,21       |
| Solyc12g036170 | Unknown Protein                                                         | 66,69      | 8,82       | -2,94       |
| Solyc12g049540 | Polyphosphoinositide phosphatase                                        | 64,60      | 30,03      | -1,11       |
| Solyc12g049250 | Unknown Protein                                                         | 56,09      | 3,19       | -4,19       |
| Solyc12g044820 | Multidrug resistance protein ABC transporter family                     | 55,49      | 11,46      | -2,30       |
| Solyc12g045020 | Cytochrome P450                                                         | 47,15      | 12,20      | -1,97       |
| Solyc12g036330 | Receptor-like protein kinase At3g21340                                  | 36,65      | 15,94      | -1,20       |
| Solyc12g038080 | Photosystem II CP43 chlorophyll apoprotein                              | 35,15      | 12,88      | -1,53       |
| Solyc12g062200 | Unknown Protein                                                         | 29,79      | 5,56       | -2,47       |
| Solyc12g049280 | NAD-dependent epimerase/dehydratase                                     | 27,07      | 13,13      | -1,16       |
| Solyc12g036390 | Calmodulin-binding protein-like                                         | 22,65      | 3,99       | -2,54       |
| Solyc12g040640 | Beta-glucosidase                                                        | 20,97      | 2,00       | -3,67       |
| Solyc12g049630 | Unknown Protein                                                         | 20,33      | 4,37       | -2,24       |
| Solyc12g017600 | Unknown Protein                                                         | 20,03      | 6,73       | -1,63       |
| Solyc12g042110 | Unknown Protein                                                         | 17,18      | 4,66       | -2,00       |
| Solyc12g038800 | Unknown Protein                                                         | 17,10      | 7,01       | -1,67       |
| Solyc12g082730 | Kinesin-like calmodulin binding protein                                 | 14,90      | 4,44       | -1,84       |
| Solyc12g027760 | Unknown Protein                                                         | 14,10      | 5,87       | -1,28       |
| Solyc12g026470 | Unknown Protein                                                         | 12,72      | 4,78       | -1,44       |
| Solyc12g042520 | Gibberellin-regulated family protein                                    | 12,17      | 2,67       | -2,32       |
| Solyc12g019640 | ATP-binding cassette transporter                                        | 10,22      | 3,57       | -1,63       |
| Solyc12g049360 | Receptor-like protein kinase At3g21340                                  | 8,73       | 2,40       | -2,45       |
| Solyc12g042100 | Unknown Protein                                                         | 7,68       | 1,11       | -3,32       |
| Solyc12g044260 | D-isomer specific 2-hydroxyacid dehydrogenase                           | 6,52       | 1,63       | -3,36       |
| Solyc12g042880 | cDNA clone J013073D14 full insert sequence                              | 6,17       | 1,45       | -2,68       |
| Solyc12g049550 | GDSL esterase/lipase 5                                                  | 5,88       | 2,40       | -2,22       |
| Solyc12g077360 | Unknown Protein                                                         | 5,34       | 1,39       | -2,58       |
| Solyc12g036320 | Serine/threonine protein kinase B                                       | 4,97       | 2,20       | -1,65       |
| Solyc12g077650 | 30S ribosomal protein S12 chloroplastic                                 | 4,71       | 1,83       | -1,32       |
| Solyc12g044680 | Unknown Protein                                                         | 4,45       | 2,00       | -1,32       |
| Solyc12g038570 | Unknown Protein                                                         | 4,31       | 1,59       | -1,58       |
| Solyc12g019630 | Unknown Protein                                                         | 4,27       | 1,00       | -2,58       |
| Solyc12g077370 | CBL-interacting protein kinase 6                                        | 3,93       | 1,66       | -1,85       |
| Solyc12g019270 | Ulp1 protease family C-terminal catalytic domain containing protein     | 3,80       | 1,00       | -2,32       |
| Solyc12g036550 | Hypothetical chloroplast RFI                                            | 3,63       | 1,76       | -1,17       |
| Solyc12g049350 | Myb 12 transcription factor                                             | 3,24       | 1,32       | -2,25       |
| Solyc12g036810 | Kinesin-like protein 73641-79546                                        | 3,01       | 1,31       | -2,17       |
| Solyc12g040870 | Nudix hydrolase 4                                                       | 2,90       | 1,67       | -1,46       |
| Solyc12g017380 | Solute carrier family 22 member 7                                       | 2,49       | 1,83       | -1,17       |
| Solyc12g070200 | Unknown Protein                                                         | 1,88       | 1,53       | -1,32       |
| Solyc12g019680 | Cytochrome P450                                                         | 1,65       | 1,00       | -2,00       |
| Solyc12g044180 | Disease resistance protein                                              | 1,61       | 1,11       | -1,32       |
| Solyc12g070160 | Transposon Ty1-BR Gag-Pol polyprotein                                   | 1,46       | 1,18       | -2,00       |

Selected candidate genes tested by qPCR are highlight in blue.

**Supplementary Table 2. Primers used in this study.**

| Purpose                           | Gene                     | Name                                   | Sequence (5' to 3')                                     |               |                         |
|-----------------------------------|--------------------------|----------------------------------------|---------------------------------------------------------|---------------|-------------------------|
| qRT-PCR candidate genes           | <i>Solyc12g042500</i>    | Gibberellin-gene-F                     | GCCTTTGGTGGCACTTGTTTC                                   |               |                         |
|                                   |                          | Gibberellin-gene-F                     | CCTGCTTTGAACACCTTAAAG                                   |               |                         |
|                                   | <i>Solyc12g044330</i>    | Aquaporin-F                            | GCCTTGCATAGCTTTGGAC                                     |               |                         |
|                                   |                          | Aquaporin-R                            | AGCAATAGCTGAACCAACTCC                                   |               |                         |
|                                   | <i>Solyc12g049400</i>    | Jasmonate-ZIM-domain-gene-F            | CAAAGCCTCAGCAACAAAGG                                    |               |                         |
|                                   |                          | Jasmonate-ZIM-domain-gene-R            | GCCGCTGGCTTATTTATTG                                     |               |                         |
|                                   | <i>Solyc12g038510</i>    | MADS-box-11-F ( <i>J-2</i> )           | TAGCCGCGGAAAACCTATG                                     |               |                         |
|                                   |                          | MADS-box-11-R ( <i>J-2</i> )           | GTCCAAAGATGCGTAACTGC                                    |               |                         |
|                                   | <i>Solyc12g019320</i>    | Multidrug-resistance-gene-F            | ATGTGGTGA TGCTTGGTCTG                                   |               |                         |
|                                   |                          | Multidrug-resistance-gene-R            | TCATAACCCAGATGCAAGAG                                    |               |                         |
|                                   | <i>Solyc12g040800</i>    | C2 domain-containing-gene-F            | CCTTGCTGTTCGTGATGTACG                                   |               |                         |
|                                   |                          | C2 domain-containing-gene-R            | GAGAGGGTCAAATCTCATTCC                                   |               |                         |
| <i>Solyc12g038520</i>             | Squamosa-promoter-gene-F | TGTTCCCGTTC TCTGTCC                    |                                                         |               |                         |
|                                   | Squamosa-promoter-gene-R | AGAGAGCACAGCCAGAGTTTG                  |                                                         |               |                         |
| <i>Solyc12g044610</i>             | Myb-gene-F               | TATTGAGCCTTCACTCTCC                    |                                                         |               |                         |
|                                   | Myb-gene-R               | CTCTGAGCTTTGACTGGTGTG                  |                                                         |               |                         |
| Sequencing CDS                    | <i>Solyc12g038510</i>    | MADS-11-CDS-F                          | ATGGGAAGAGGAAGAGTGAAGT                                  |               |                         |
|                                   |                          | MADS-11-CDS-F                          | TTAGAGCATCCACCCTGGAA                                    |               |                         |
|                                   | <i>Solyc12g042500</i>    | Gibberellin-CDS-F                      | ATGAAGTAAAGTTTCAACTTTG                                  |               |                         |
| Genotyping <i>j-2</i> mutants     | <i>Solyc12g038510</i>    | Gibberellin-CDS-R                      | TTAAGGACATTTAGGCCCTCCC                                  |               |                         |
|                                   |                          | PCR1-5'UTR-F                           | AACAGTGTCTCTCTCTTTCCA                                   |               |                         |
|                                   |                          | PCR1-Intron1-R                         | GGGCCACATATAAGATTCA                                     |               |                         |
|                                   |                          | PCR2-Intron1-F                         | GAGCATTGAACGCTAACCTCA                                   |               |                         |
|                                   |                          | PCR2-Intron2-R                         | AAAAAGAATCACGGGCACAC                                    |               |                         |
|                                   |                          | PCR3-Intron2-F                         | TGAGTGGAAGTAAGGTTTCGATCT                                |               |                         |
|                                   |                          | PCR3-Intron4-R                         | AAAATGACTATCGAGGCATGG                                   |               |                         |
|                                   |                          | PCR4-Intron4-F                         | TTTTTAAC TGCCCGCAAAGT                                   |               |                         |
|                                   |                          | PCR4-Intron7-R                         | TGTCAAATATTAATGCCGCTGA                                  |               |                         |
|                                   |                          | PCR5-Intron7-F                         | TGGTTTGGTGAAAAATAAAGAGAA                                |               |                         |
|                                   |                          | PCR5-3'UTR-R                           | GGCCGCGAGTTGTTATTTT                                     |               |                         |
|                                   |                          | qRT-PCR on pedicel (WT vs <i>j-2</i> ) | <i>Solyc11g010570</i>                                   | J-F           | AAGGC AAAATGAGGGGAGAAG  |
| J-R                               | CGGCTCAATCCAGTTTCAAG     |                                        |                                                         |               |                         |
| <i>Solyc05g056620</i>             | MC-F                     |                                        | CCTCAAAGGAACCAACAAGC                                    |               |                         |
|                                   | MC-R                     |                                        | GCTGTGTTCCAAAGTTTTCG                                    |               |                         |
| <i>Solyc03g114840</i>             | MADS1-F                  |                                        | TGCTACTTTGGAAGCCAAAC                                    |               |                         |
|                                   | MADS1-R                  |                                        | TCTCTGAGATCGTTGGAGGAG                                   |               |                         |
| <i>Solyc02g083950</i>             | WUS-F                    |                                        | TGGAGAAGAGCTTTAGGGGAGTG                                 |               |                         |
|                                   | WUS-R                    |                                        | GATCAACCAACCCATGTC                                      |               |                         |
| <i>Solyc11g069030</i>             | BI-F                     |                                        | AAAGAGGTCCAATGGTCTCCAG                                  |               |                         |
|                                   | BI-R                     |                                        | CCCTGTTTTTGAGGAAGTGC                                    |               |                         |
| <i>Solyc07g062840</i>             | GOB-F                    |                                        | TGAACCTTGGGAACCTTCTTG                                   |               |                         |
|                                   | GOB-R                    |                                        | GTTGGATACTTCCGATCACG                                    |               |                         |
| <i>Solyc07g066250</i>             | LS-F                     | CGACATTAATCACGGGGTTC                   |                                                         |               |                         |
|                                   | LS-R                     | TACCGGTGATTCGAAGAGTG                   |                                                         |               |                         |
| Housekeeping gene                 | <i>Solyc03g115810</i>    | VAC-F                                  | CGGAACGGATAATCTGAGG                                     |               |                         |
|                                   |                          | VAC-R                                  | CAGAAATGTTCTCCACACG                                     |               |                         |
| <i>in situ</i> hybridation probes | <i>Solyc12g038510</i>    | J-2-AntiSens-F                         | ATGGGAAGAGGAAGAGTAGAACT                                 |               |                         |
|                                   |                          | T7-J-2-AntiSens-R                      | TGTAATACGACTCACTATAGGGCTTAGAGCATCCACCCTGGAA             |               |                         |
|                                   |                          | T7-J-2-sens-F                          | TGTAATACGACTCACTATAGGGCATGGGAAGAGGAAGAGTAGAACT          |               |                         |
| qRT-PCR for MeDIP-PCR experiments | <i>Solyc12g038510</i>    | J-2-Sens-R                             | TTAGAGCATCCACCCTGGAA                                    |               |                         |
|                                   |                          | MeDIP-PCR1-F                           | AAGACAGCTCGTAAGGGAAGC                                   |               |                         |
|                                   |                          | MeDIP-PCR1-R                           | TTTGACACGAACATCAACG                                     |               |                         |
|                                   |                          | MeDIP-PCR2-F                           | GGGAGGCAGATGTGAGTTATGAGG                                |               |                         |
|                                   |                          | MeDIP-PCR2-R                           | GCCTACTAAGTACACAAATTTG                                  |               |                         |
|                                   |                          | MeDIP-PCR3-F                           | CATTATATGTGACTTATCAATTTG                                |               |                         |
|                                   |                          | MeDIP-PCR3-R                           | TGGAAAGAGAGAGAAGCACTG                                   |               |                         |
|                                   |                          | MeDIP-PCR4-F                           | GTGTTTTCTTGTAGAGAC                                      |               |                         |
|                                   |                          | MeDIP-PCR4-R                           | CATTCTCTCTTAGCAAAG                                      |               |                         |
|                                   |                          | MeDIP-PCR5-F                           | GTTGCTCTCATCTCTCTTAGC                                   |               |                         |
|                                   |                          | MeDIP-PCR5-R                           | CCGCTCTTCTGTTGTAGC                                      |               |                         |
|                                   |                          | MeDIP-PCR6-F                           | CCTCTCGGTTAATCGGTGTTCTTGG                               |               |                         |
|                                   |                          | MeDIP-PCR6-R                           | GCCTCATCTTGATCTGCCATAAAC                                |               |                         |
|                                   |                          | MeDIP-PCR7-F                           | GGTGAACACGTAATCTGTG                                     |               |                         |
|                                   |                          | MeDIP-PCR7-R                           | ACACATACGCACACACAAAAG                                   |               |                         |
|                                   |                          | MeDIP-PCR8-F                           | TGAAATCTTATATGTGGGCC                                    |               |                         |
|                                   |                          | MeDIP-PCR8-R                           | GTGATAAACCTAATGGATG                                     |               |                         |
|                                   |                          | MeDIP-PCR9-F                           | GGGTTTTCCAATGTTACCAATTC                                 |               |                         |
|                                   |                          | MeDIP-PCR9-R                           | CCTGCATAAGCAGCCTTTTC                                    |               |                         |
|                                   |                          | MeDIP-PCR10-F                          | GCAGCATGTGGGAAAAATTAC                                   |               |                         |
|                                   |                          | MeDIP-PCR10-R                          | GTCCAAAGATGCGTAACTGC                                    |               |                         |
|                                   |                          | MeDIP-PCR11-F                          | GCTCTTCAACGTTCTCAAAGA                                   |               |                         |
|                                   |                          | MeDIP-PCR11-R                          | AATTGGTGCTCAAGTGCTC                                     |               |                         |
|                                   |                          | Cloning Transposon on pGEMT-Easy       | <i>Rider-J-2</i>                                        | MeDIP-PCR12-F | TGTTTCCCGTCTCTGTGTTCC   |
| MeDIP-PCR12-R                     | AGAGAGCACAGCCAGAGTTTG    |                                        |                                                         |               |                         |
| PCR1-5'UTR-F                      | AACAGTGTCTCTCTCTTTCCA    |                                        |                                                         |               |                         |
| PCR1-Intron1-R                    | GGGCCACATATAAGATTCA      |                                        |                                                         |               |                         |
| pEasy-Rider-1                     | AACAGTGTCTCTCTCTTTCCA    |                                        |                                                         |               |                         |
| pEasy-Rider-2                     | GGGCCACATATAAGATTCA      |                                        |                                                         |               |                         |
| Sequencing of pGEMT-Easy clones   | <i>Rider-J-2</i>         | pEasy-Rider-3                          | CGGCTAGAGAAGATGATGAGGCAAC                               |               |                         |
|                                   |                          | pEasy-Rider-4                          | ATGGAGTCCGTAGACATTCAGATC                                |               |                         |
|                                   |                          | pEasy-Rider-5                          | ATGAAGAGACTGCTGCTGGTCTG                                 |               |                         |
|                                   |                          | pEasy-Rider-6                          | GAGTGTGCTATCCGCAACTAGG                                  |               |                         |
|                                   |                          | pEasy-Rider-7                          | CCCGAGGGCAATTAACAGCTTC                                  |               |                         |
|                                   |                          | pEasy-Rider-8                          | CAAGGCATTCACAAATCTCCACC                                 |               |                         |
|                                   |                          | pEasy-Rider-9                          | AAGATATGCCCTAGTTGCGGATG                                 |               |                         |
|                                   |                          | pEasy-Rider-10                         | CCAGTGCCGTAGGAAGTTTGATGATG                              |               |                         |
|                                   |                          | sgRNA1                                 | TGTGGTCTCAATTAGCTCTTCAACGTTCTCAAGTTTAGAGCTAGAAATAGCAAG  |               |                         |
|                                   |                          | sgRNA2                                 | TGTGGTCTCAATTACATAATTTGAGAGGAGATTGTTTAGAGCTAGAAATAGCAAG |               |                         |
|                                   |                          | Genotyping <i>CR-Slf-2</i> lines       |                                                         | CR-Slf-2 F    | ATATTGAATCGTGTGATTTGCTC |
|                                   |                          |                                        |                                                         | CR-Slf-2 R    | TAACTTTCTCAAAGATGCATCC  |
